# Supplementary material
Source: PubMed Central journal article supplement (PMC4002084)

Degradation of the Phycobilisomes in *Synechocystis* sp. PCC6803: Evidence for an essential NblA1/NblA2 heterodimer formation

Antje Baier<sup>1</sup>, Wiebke Winkler<sup>1</sup>, Thomas Korte<sup>2</sup>, Wolfgang Lockau<sup>1</sup> and Anne Karradt<sup>1</sup>

**TABLE S1.** Strains, plasmids and oligonucleotides used in this study.

**FIGURE S1.** Plasmid construction. *A*, Constructs for the interaction analysis of NblA1<sub>6803</sub> and NblA2<sub>6803</sub> via FRET *in vivo*. The DNA sequences encoding *nblA1*<sub>6803</sub> and *nblA2*<sub>6803</sub> and its promoter and terminator regions, respectively, were amplified by PCR. The marked restriction sites were generated by mutagenesis and the encoding regions for *yfp* and *cer* were cloned in the restriction sites, respectively. *B*, Map of the *cpcA* region of plasmid pGEX/*cpcA*6803. Construct for the heterologous expression of the apoprotein of Phycocyanin (*cpcA*) with N-terminally tagged GST. *C*, Map of the *clpC*<sub>6803</sub> region of plasmid pET11/ClpC. Construct for the heterologous expression of ClpC<sub>6803</sub>. *D*, Map of the *nblA1*<sub>6803</sub> region of plasmid pACYC/A1\_GST. Construct for the heterologous expression of NblA1<sub>6803</sub> with C-terminally tagged GST. *E*, Map of the *nblA2* region of plasmid pACYC/A2\_GST. Construct for the heterologous expression of NblA2 with C-terminally tagged GST. *F*, Map of the *nblA1*<sub>6803</sub> and *nblA2*<sub>6803</sub> region of plasmid pACYC/His\_A1, A2\_GST. Construct for the heterologous co-expression of NblA1<sub>6803</sub> with N-terminally tagged His and NblA2 with C-terminally tagged GST. *G*, Map of the *nblA1*<sub>6803</sub> and *nblA2*<sub>6803</sub> region of plasmid pACYC/His\_A2, A1\_GST. Construct for the heterologous co-expression of NblA2 with N-terminally tagged His and NblA1<sub>6803</sub> with C-terminally tagged GST. *H*, Map of the *nblA1*<sub>6803</sub> and *nblA2*<sub>6803</sub> region of plasmid pACYC/A2, A1\_GST. Construct for the heterologous co-expression of NblA2<sub>6803</sub> and NblA1<sub>6803</sub> with C-terminally tagged GST. *I*, Map of the *clpP1* and *clpR* region of plasmid pACYC/ClpP1\_His, ClpR. Construct for the heterologous co-expression of ClpP1 with C-terminally tagged His and ClpR. *J*, Construct for complementation analysis of the non-bleaching phenotype of the *Synechocystis* 6803  $\Delta nblA1/nblA2$  double mutant. The DNA sequences encoding *nblA1*<sub>6803</sub> and *nblA2*<sub>6803</sub> and its promoter and terminator regions, respectively, were amplified by PCR. *K*, Construct for complementation analysis of the non-bleaching phenotype of the *Synechocystis* 6803  $\Delta nblA1/nblA2$  double mutant. The DNA sequences encoding *nblA* of *Nostoc* 7120 and the promoter and terminator regions of *nblA1*<sub>6803</sub> and *nblA2*<sub>6803</sub>, respectively, were amplified by PCR.

TABLE S1.

| Strain, plasmid or oligonucleotides                                                                  | Description                                                                                                     | Source or reference                                                                   |
|------------------------------------------------------------------------------------------------------|-----------------------------------------------------------------------------------------------------------------|---------------------------------------------------------------------------------------|
| <i>Synechocystis</i> strains                                                                         |                                                                                                                 |                                                                                       |
| <i>Synechocystis</i> sp. PCC6803                                                                     | wild-type                                                                                                       | This reference                                                                        |
| <i>Synechocystis</i> 6803 $\Delta nbla2$<br><i>Synechocystis</i> 6803<br>$\Delta nbla1/nbla2$ mutant |                                                                                                                 | This reference                                                                        |
| Plasmids                                                                                             |                                                                                                                 |                                                                                       |
| pGEX-2TK                                                                                             | Expression vector carrying <i>gst</i>                                                                           | GE Healthcare, Waukesha, WI                                                           |
| pGEX/cpcA6803                                                                                        | Expression vector carrying <i>gst-cpcA</i>                                                                      | This reference                                                                        |
| pGEX-2TK/NdeI                                                                                        | Expression vector carrying additional <i>NdeI</i> site                                                          | Karradt <i>et al.</i> , 2008                                                          |
| pACYCDuet-1                                                                                          | Vector for coexpression of two genes, containing two multiple cloning sites (MCS)                               | Novagen, Darmstadt                                                                    |
| pACYC/GST                                                                                            | Vector for coexpression of two genes, carrying additional <i>gst</i> gene (MCS2)                                |                                                                                       |
| pACYC/A1_GST                                                                                         | Vector for expression of <i>nbla1-gst</i> (MCS2)                                                                | This reference                                                                        |
| pACYC/A2_GST                                                                                         | Vector for expression of <i>nbla2-gst</i> (MCS2)                                                                | This reference                                                                        |
| pACYC/His_A2, A1_GST                                                                                 | Vector for coexpression of <i>his-nbla2</i> (MCS1) and <i>nbla1-gst</i> (MCS2)                                  | This reference                                                                        |
| pACYC/His_A1, A2_GST                                                                                 | Vector for coexpression of <i>his-nbla1</i> (MCS1) and <i>nbla2-gst</i> (MCS2)                                  | This reference                                                                        |
| pACYC/A2, A1_GST                                                                                     | Vector for coexpression of <i>nbla2</i> (MCS1) and <i>nbla1-gst</i> (MCS2)                                      | This reference                                                                        |
| pACYC/ClpP1-His                                                                                      | Vector for expression of <i>clpP1-his</i> (MCS1)                                                                |                                                                                       |
| pACYC/ClpP1-His, ClpR                                                                                | Vector for coexpression of <i>clpP1-his</i> (MCS1) and <i>clpR</i> (MCS2)                                       | This reference                                                                        |
| pEmYFP-N1                                                                                            | Vector containing a monomeric variant of YFP [Zacharias <i>et al.</i> , 2002]                                   | provided by Silvia Scolari [Scolari <i>et al.</i> , 2009; Engel <i>et al.</i> , 2010] |
| pEmCFP-N1                                                                                            | Vector containing a monomeric variant of CFP [Zacharias <i>et al.</i> , 2002]                                   | provided by Silvia Scolari [Scolari <i>et al.</i> , 2009]                             |
| pEmCer-N1                                                                                            | Vector containing a monomeric variant of pCerulean [Zacharias <i>et al.</i> , 2002; Rizzo <i>et al.</i> , 2004] | provided by Silvia Scolari [Dissertation]                                             |
| pET11a                                                                                               | Expression vector                                                                                               | Novagen, Darmstadt                                                                    |
| pET11/ClpC                                                                                           | Vector for expression of <i>clpC</i>                                                                            | This reference                                                                        |
| pET15b                                                                                               | Expression vector                                                                                               | Novagen, Darmstadt                                                                    |
| pET15b/P6803Nbla7942                                                                                 | Cloning vector carrying P <sub>6803</sub> - <i>nbla</i> <sub>7942</sub>                                         | This reference                                                                        |

|                               |                                                                                             |                                   |
|-------------------------------|---------------------------------------------------------------------------------------------|-----------------------------------|
| pET22b                        | Expression vector                                                                           | Novagen,<br>Darmstadt             |
| pET22b/His-ClpC               | Expression vector carrying <i>his-clpC</i>                                                  | This reference                    |
| pET22/A1_YFP, A2              | Cloning vector carrying P <sub>6803</sub> - <i>nblA1yfp-nblA2-T</i> <sub>6803</sub>         | This reference                    |
| pET22/A1_YFP, A2_Cer          | Cloning vector carrying<br>P <sub>6803</sub> - <i>nblA1yfp-nblA2Cer-T</i> <sub>6803</sub>   | This reference                    |
| pET22/A1, A2_Cer              | Cloning vector carrying P <sub>6803</sub> - <i>nblA1-nblA2Cer-T</i> <sub>6803</sub>         | This reference                    |
| pET22/A2_YFP, A2_Cer          | Cloning vector carrying<br>P <sub>6803</sub> - <i>nblA2yfp-nblA2Cer-T</i> <sub>6803</sub>   | This reference                    |
| pET22/YFP_A1, A2              | Cloning vector carrying P <sub>6803</sub> - <i>yfpnblA1-nblA2-T</i> <sub>6803</sub>         | This reference                    |
| pET22/ A1, Cer_A2             | Cloning vector carrying P <sub>6803</sub> - <i>nblA1-cernblA2-T</i> <sub>6803</sub>         | This reference                    |
| pET22/YFP_A1, Cer_A2          | Cloning vector carrying<br>P <sub>6803</sub> - <i>yfpnblA1-cernblA2-T</i> <sub>6803</sub>   | This reference                    |
| pET22/P6803-NblA7120-T6803    | Cloning vector carrying P <sub>6803</sub> - <i>nblA7120-T</i> <sub>6803</sub>               | This reference                    |
|                               |                                                                                             |                                   |
| pVZ321                        | Shuttle vector containing Cm <sup>r</sup> and Km <sup>r</sup> resistance cassette           | Zinchenko <i>et al.</i> ,<br>1999 |
| pVZ/A1_YFP, A2                | Shuttle vector containing P <sub>6803</sub> - <i>nblA1yfp-nblA2-T</i> <sub>6803</sub>       | This reference                    |
| pVZ/A1_YFP, A2_Cer            | Shuttle vector containing<br>P <sub>6803</sub> - <i>nblA1yfp-nblA2Cer-T</i> <sub>6803</sub> | This reference                    |
| pVZ/A1, A2_Cer                | Shuttle vector containing P <sub>6803</sub> - <i>nblA1-nblA2Cer-T</i> <sub>6803</sub>       | This reference                    |
| pVZ/A2_YFP, A2_Cer            | Shuttle vector containing<br>P <sub>6803</sub> - <i>nblA2yfp-nblA2Cer-T</i> <sub>6803</sub> | This reference                    |
| pVZ/YFP_A1, A2                | Shuttle vector containing P <sub>6803</sub> - <i>yfpnblA1-nblA2-T</i> <sub>6803</sub>       | This reference                    |
| pVZ/ A1, Cer_A2               | Shuttle vector containing P <sub>6803</sub> - <i>nblA1-cernblA2-T</i> <sub>6803</sub>       | This reference                    |
|                               |                                                                                             | This reference                    |
| pVZ/YFP_A1, Cer_A2            | Shuttle vector containing<br>P <sub>6803</sub> - <i>yfpnblA1-cernblA2-T</i> <sub>6803</sub> | This reference                    |
| pVZ/P6803-NblA7120-T6803      | Shuttle vector carrying P <sub>6803</sub> - <i>nblA7120-T</i> <sub>6803</sub>               | This reference                    |
|                               |                                                                                             |                                   |
| Oligonucleotides <sup>a</sup> |                                                                                             |                                   |
| # cpcA_1                      | GATACCGGATCCATGAAAACCCC                                                                     |                                   |
| # cpcA_2                      | GAATTCAAAACCTGACTAGCTCAG                                                                    |                                   |
| # nbl7                        | GCAACACATATGAAACC                                                                           |                                   |
| # nbl11                       | CCAAACAACATTGGGCTCGAGAGTTAG                                                                 |                                   |
| # nbl13                       | CGAAGGATTCAGGTTCCATGGCTGTTG                                                                 |                                   |
| # nbl14                       | GGAGTGCGATCGCCATGGTCAACAACG                                                                 |                                   |
| # nbl21                       | GCCTAAACCTAGAATTCTGCTAG                                                                     |                                   |
| # nbl24                       | GGAGTGCGATCCATATGATCAACAACG                                                                 |                                   |
| # nbl26                       | CCTAGAGTTGTGCATATGGAGGAGTG                                                                  |                                   |
| # nbl27                       | GCAACAACAAGAGTTTCTAGACCGGG                                                                  |                                   |
| # nbl28                       | CCATATGGGGCCCCTGGAACAGAACTTCCAGACCTAGGGGCTCCAG                                              |                                   |
| # nbl31                       | ACATATGGGGCCCCTGGAACACAACTTCCAGGGGGAGGAGTGAATTTTC                                           |                                   |
| # nbl32                       | CTTGAGGAATTCAGCTATG                                                                         |                                   |
| # nbl33                       | CTAAACCTAAGCTTGTGCTAG                                                                       |                                   |
| # nbl34                       | ATTAGAATTCCGCCATGATCAACAACG                                                                 |                                   |
| # nbl37                       | GAGTTGTGCTACCATGGGAGTGAAT                                                                   |                                   |
| # nblA-4                      | GACAGCAAGCTTATTTTTTTGCC                                                                     |                                   |

Supplemental - Phycobilisome degradation by NblA1/NblA2 in *Synechocystis* 6803

|              |                                                    |
|--------------|----------------------------------------------------|
| # nblana2.23 | GGAGTCTGCCATGGACCAACCAATC                          |
| # nblana2.24 | GCGACACATATGAACTCTATGCCGG                          |
| # clpc_3     | GGATTTAGCATATGTTTGAACGC                            |
| # clpc_5     | GCTGGGGATCCTAATTATTCAAC                            |
| # CFP1       | CGGTCGCCCATATGGTGAGCAAGGG                          |
| # CFP2       | CCGCTTTACATATGCAGCTCGTCCATG                        |
| # YFP1       | GGTCGCCACCATGGTGAGCAAG                             |
| # YFP2       | CGCTTTCCATGGACAGCTCGTCCATG                         |
| # nblA1_QCM1 | GCGCCAGGCTCCCCTGGAGCCCATGGGTAAAGCACAGGCAGGC        |
| # nblA1_QCM2 | GCCTGCCTGTGCTTAACCCATGGGCTCCAGGGGAGCCTGGCGC        |
| # nblA1_QCM3 | CGCCTTGGAGGGCAACAGCCATGGAACCTGAATCCTTCGATCTCA      |
| # nblA1_QCM4 | TGAGATCGAAGGATTCAGGTTCCATGGCTGTTGCCCTCCAAGGCG      |
| # nblA2_QCM1 | GATTTGATGAAAAATTCACCTCCATATGTAGCACAACCTCTAGGTTTAGG |
| # nblA2_QCM2 | CCTAAACCTAGAGTTGTGCTACATATGGAGTGAATTTTCATCAAATC    |
| # nblA2_QCM3 | CATTTTTTCAGGAGTGCATCCATATGATCAACAACGAAGCCTTTAACC   |
| # nblA2_QCM4 | GGTTAAAGGCTTCGTTGTTGATCATATGGATCGCACTCCTGAAAAAATG  |
| # clpR_1     | CAACCTGACCATATGGAAATAAC                            |
| # clpR_2     | GAATGGAAACCTCGAGAATCACTG                           |
| # clpP1_1    | GTAACAACACCCCATGGCCATGATTCC                        |
| # clpP1_2    | GAGCTAAATACACCATGGAAATAGGGTC                       |

<sup>a</sup> Oligonucleotides read in 5' to -3' direction. Restriction sites in oligonucleotides are underlined.

FIGURE S1.

A

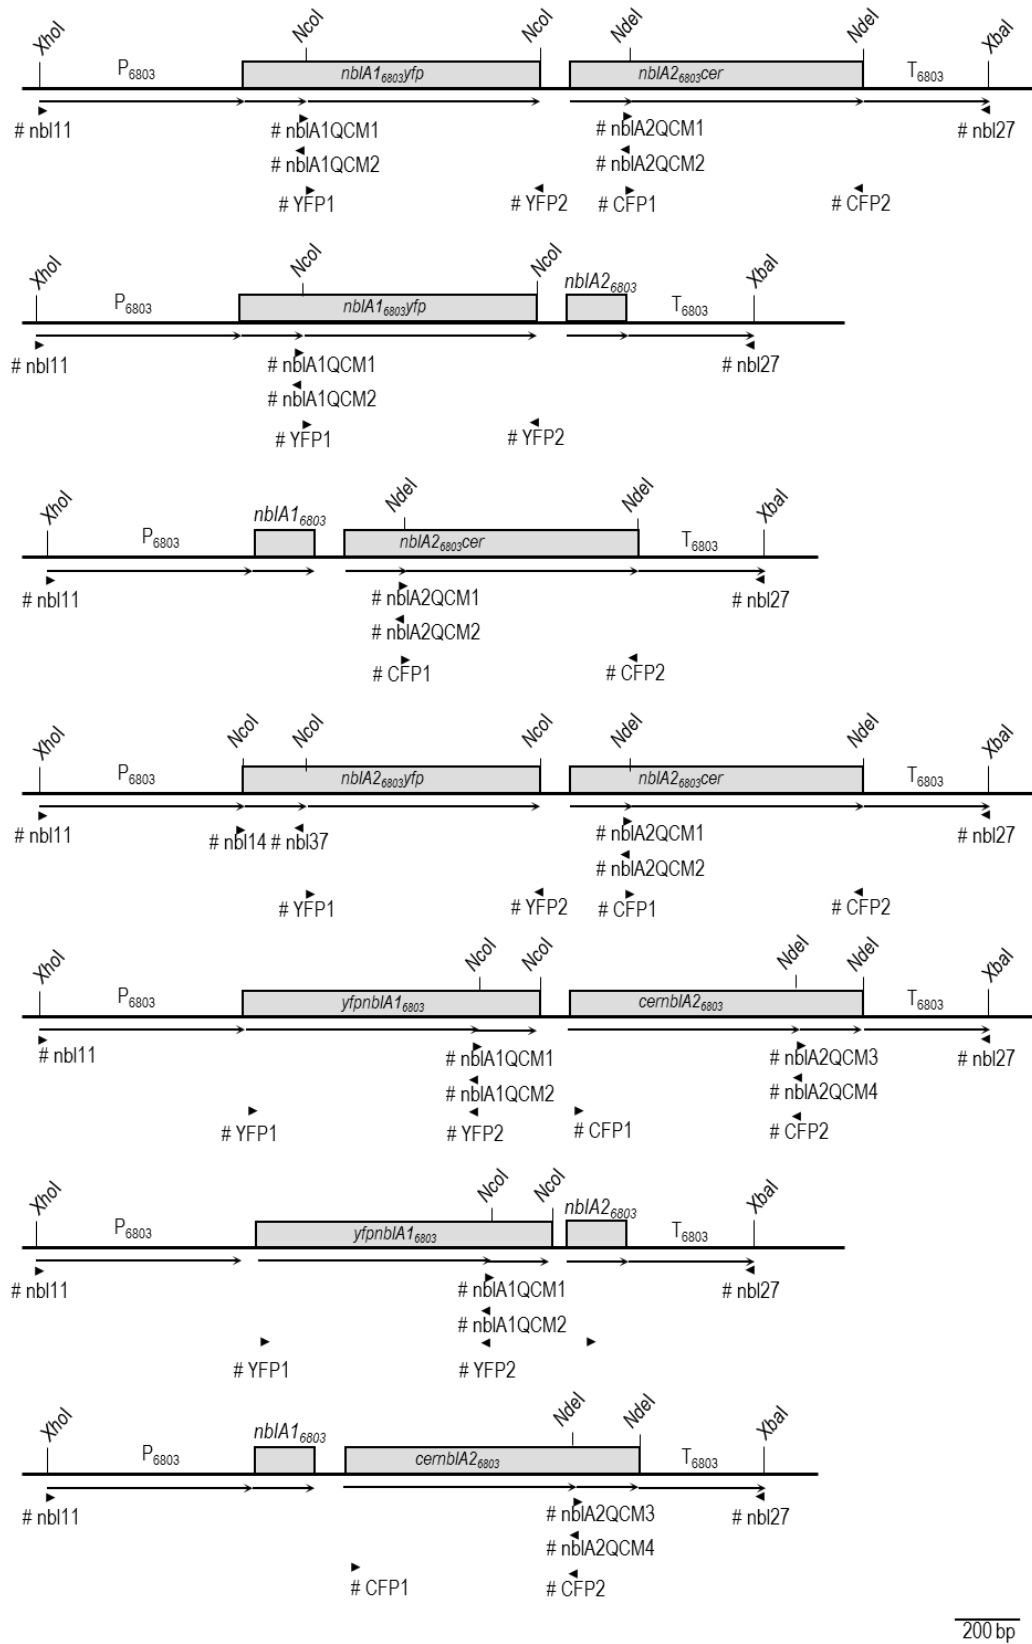

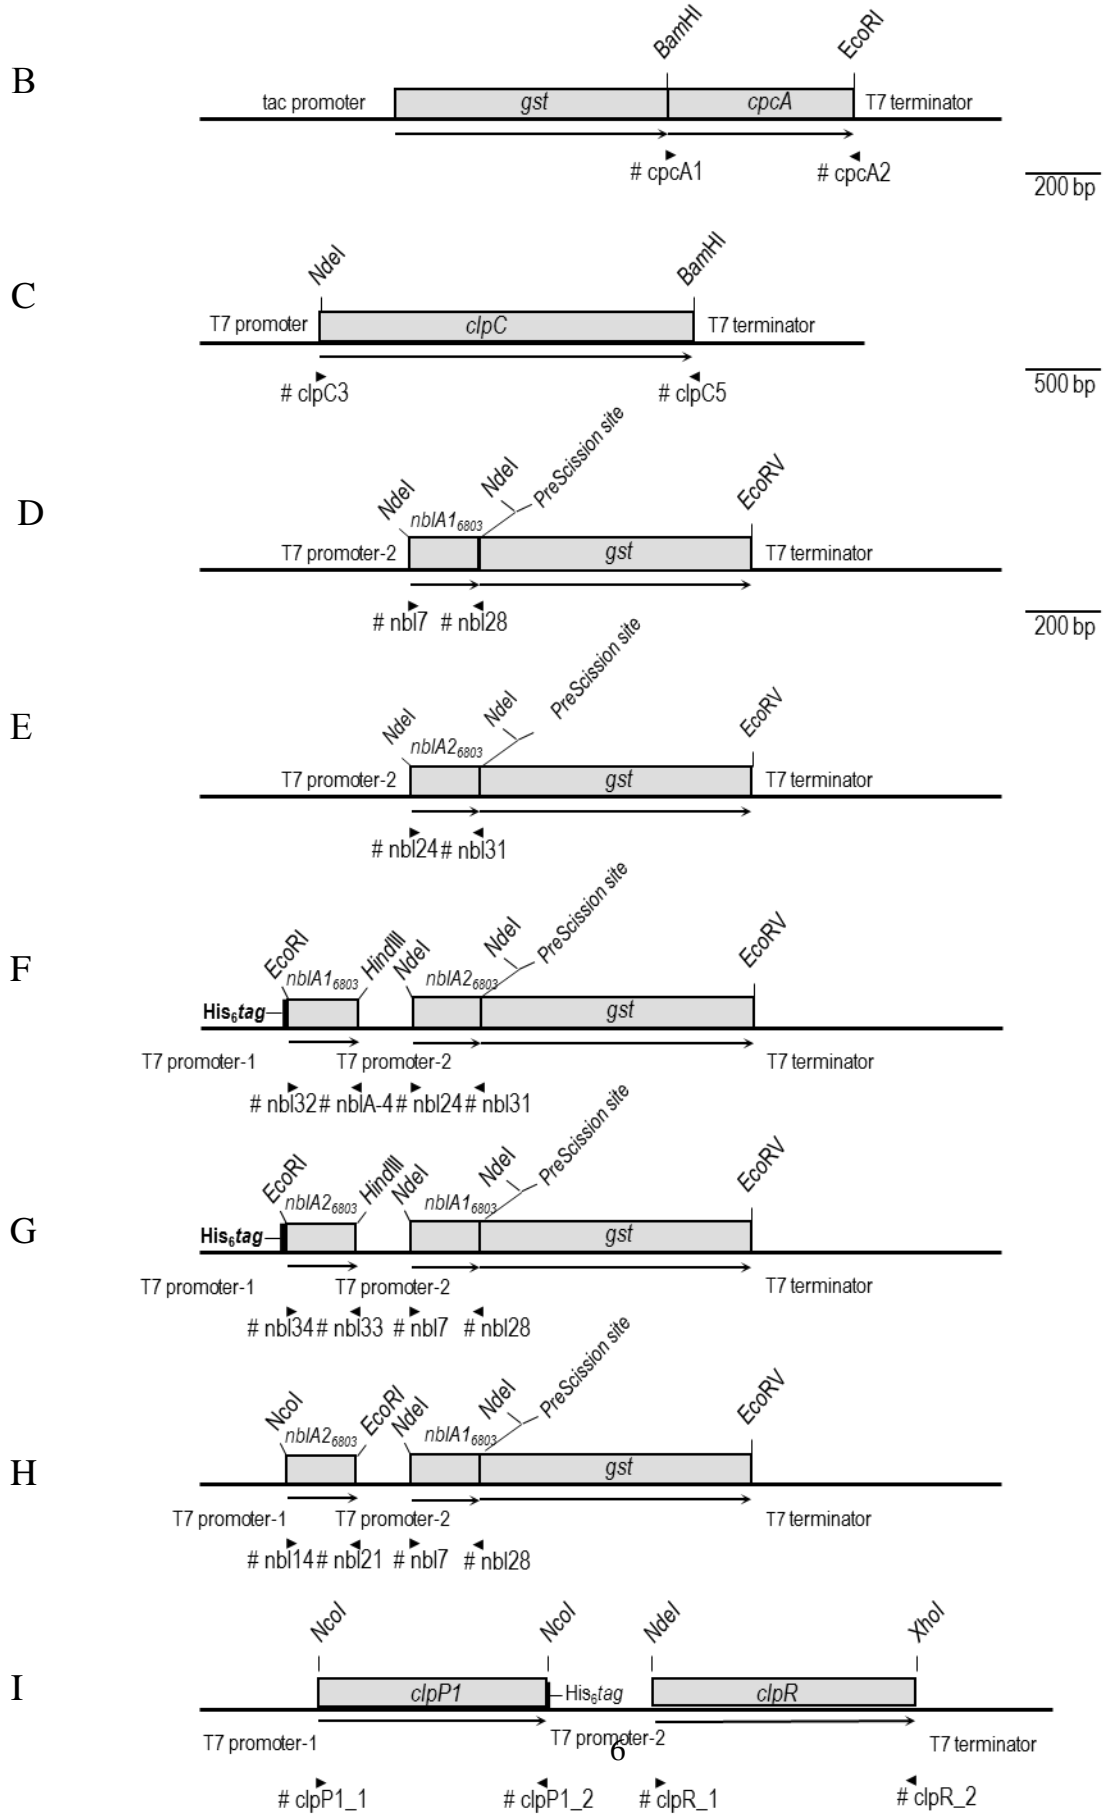

Supplemental - Phycobilisome degradation by NblA1/NblA2 in *Synechocystis* 6803

J

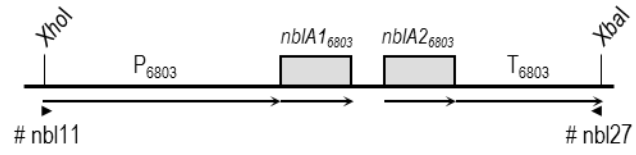

K

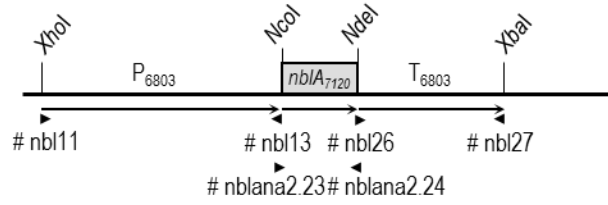

Supplement: supp_M113.520601_jbc.M113.520601-1.pdf [file supp_M113.520601_jbc.M113.520601-1.pdf]
